# Supplementary material
Source: Springer Nature journal article supplement (https://www.springermedizin.de/resource/supplementary/13017_2011_210_MOESM1_ESM.pdf/9635712)

[H]

L19

pa

[F]

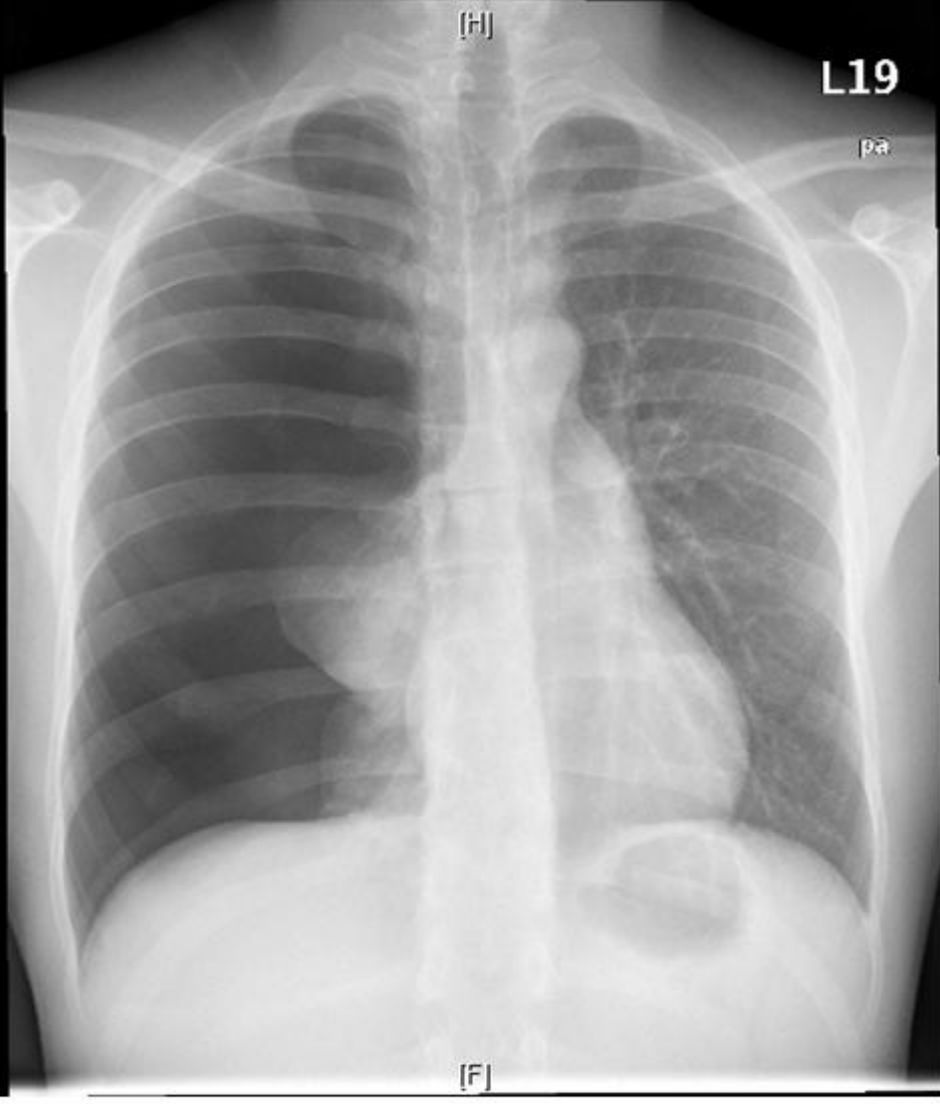

Supplement: MOESM1 [file 9635712]
